# Supplementary material for: Acute Effects of Cheddar Cheese Consumption on Circulating Amino Acids and Human Skeletal Muscle
Source: PubMed Central journal article supplement (PMC7917914; doi:10.3390/nu13020614), 2021-02-13
Supplement: nutrients-13-00614-s001.pdf [file nutrients-13-00614-s001.pdf]

**Supplemental Table S1.** Amino acid composition of Cheddar cheese and milk

|               | <b>Cheddar Cheese</b> | <b>2% Milk</b>       |
|---------------|-----------------------|----------------------|
|               | <b>g/20g protein</b>  | <b>g/20g protein</b> |
| Alanine       | 0.582                 | 0.640                |
| Arginine      | 0.768                 | 0.710                |
| Aspartic Acid | 1.438                 | 1.544                |
| Cystine       | 0.065                 | 0.150                |
| Glutamic Acid | 4.540                 | 4.240                |
| Glycine       | 0.384                 | 0.384                |
| Histidine     | 0.616                 | 0.582                |
| Isoleucine    | 1.008                 | 1.036                |
| Leucine       | 1.972                 | 1.988                |
| Lysine        | 1.654                 | 1.702                |
| Methionine    | 0.540                 | 0.520                |
| Phenylalanine | 1.114                 | 1.016                |
| Proline       | 2.200                 | 1.942                |
| Serine        | 1.186                 | 1.122                |
| Threonine     | 0.772                 | 0.876                |
| Tyrosine      | 1.228                 | 1.102                |
| Valine        | 1.426                 | 1.340                |

Note: Tryptophan detection not performed
